# Supplementary material for: Exploring condensable organic vapors and their co-occurrence with PM2.5and O3in winter in Eastern China
Source: Royal Society of Chemistry journal article supplement (doi:10.1039/d2ea00143h), 2023-01-01
Supplement: d2ea00143h1.pdf [file d2ea00143h1.pdf]

1

## 2 Table of contents

|    |                                                                                 |    |
|----|---------------------------------------------------------------------------------|----|
| 3  | S1 Overview of measurements .....                                               | 1  |
| 4  | S2 binPMF analysis .....                                                        | 2  |
| 5  | S3 Calculation of molecular properties of OOMs .....                            | 8  |
| 6  | S4 Main peaks of 7 discussed non-nitrated-phenols factors .....                 | 9  |
| 7  | S5 The additional information of the Arom-OOM factor.....                       | 13 |
| 8  | S6 The additional information of two Aliph-OOM factors .....                    | 14 |
| 9  | S7 The additional information of two O <sub>3</sub> -related factors.....       | 16 |
| 10 | S8 The additional information of the Mixed-OOM and the MT-mixed-OOM factors ... | 17 |
| 11 | S9 The additional information of NP factors .....                               | 19 |
| 12 | S10 The molecular information of the high-quality OOMs dataset .....            | 20 |
| 13 | S11 Relationship of OOMs with O <sub>3</sub> , PM <sub>2.5</sub> .....          | 21 |
| 14 | S12 Relationship of PM <sub>2.5</sub> with O <sub>x</sub> and PAN.....          | 21 |
| 15 | S13 The calculation of OH proxy .....                                           | 22 |
| 16 |                                                                                 |    |

## 17 S1 Overview of measurements

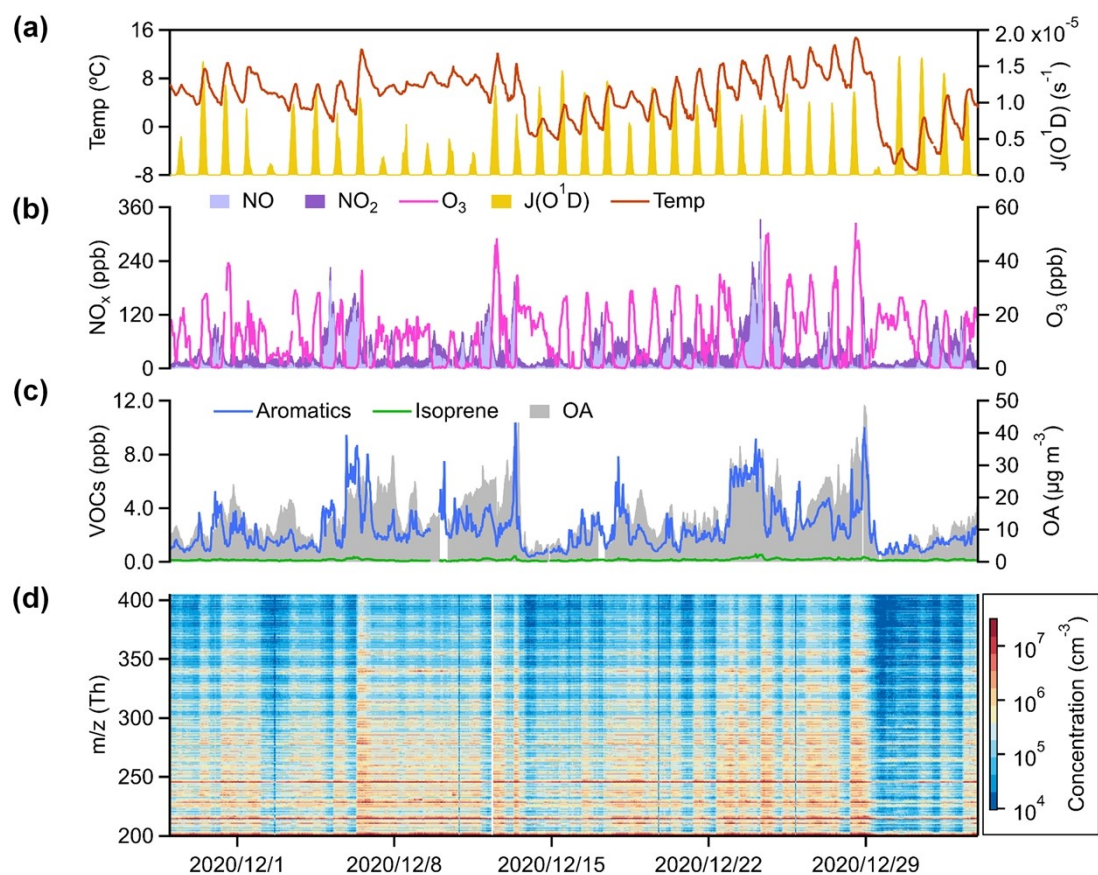

18

19 Fig. S1 Overview of measurements during the campaign. Time series of (a) temperature  
20 (Temp) and the photolysis frequency of O<sub>3</sub> (J(O<sup>1</sup>D)); (b) O<sub>3</sub> and NO<sub>x</sub> (NO + NO<sub>2</sub>); (c)  
21 total aromatics (benzene + toluene + C<sub>8</sub> aromatics + C<sub>9</sub> aromatics + C<sub>10</sub> aromatics +  
22 styrene), isoprene, and OAs; and (d) mass spectra of the nitrate CI-API-TOF with m/z

23 in the range of 203–404 Th.

## 24 S2 binPMF analysis

### 25 S2.1 binPMF inputs

26

#### 27 Data matrix

28

29 As described in Zhang et al.<sup>1</sup>, we divided the mass spectra measured by nitrate CI-APi-  
30 TOF into small bins of 0.006 Th width and performed the baseline subtraction and mass  
31 axis calibration. Figure S2 shows the averaged binned spectrum with marked deleted  
32 bins that nitrated phenol and some fluorinated contaminations (Table S1) that are not  
33 our main focus. Besides, we selected the mass bins in the range of 203-404 Th with an  
34 appropriate signal-to-noise ratio (SNR > 0.9) as data matrix for binPMF input,  
35 neglecting quite weak signals to reduce unnecessary computation.

36

37 Table S1. Peak list of deleted bins

| Mass-to-charge<br>(Th) | Formulas                  |
|------------------------|---------------------------|
| 201.0153               | $C_6H_5NO_3(NO_3^-)$      |
| 215.0310               | $C_7H_7NO_3(NO_3^-)$      |
| 223.8617               | $ICl(NO_3^-)$             |
| 229.0466               | $C_8H_9NO_3(NO_3^-)$      |
| 246.0004               | $C_6H_4N_2O_5c$           |
| 250.8807               | $IONO_2(NO_3^-)$          |
| 264.0110               | $C_6H_5NO_3(HNO_3NO_3^-)$ |

38

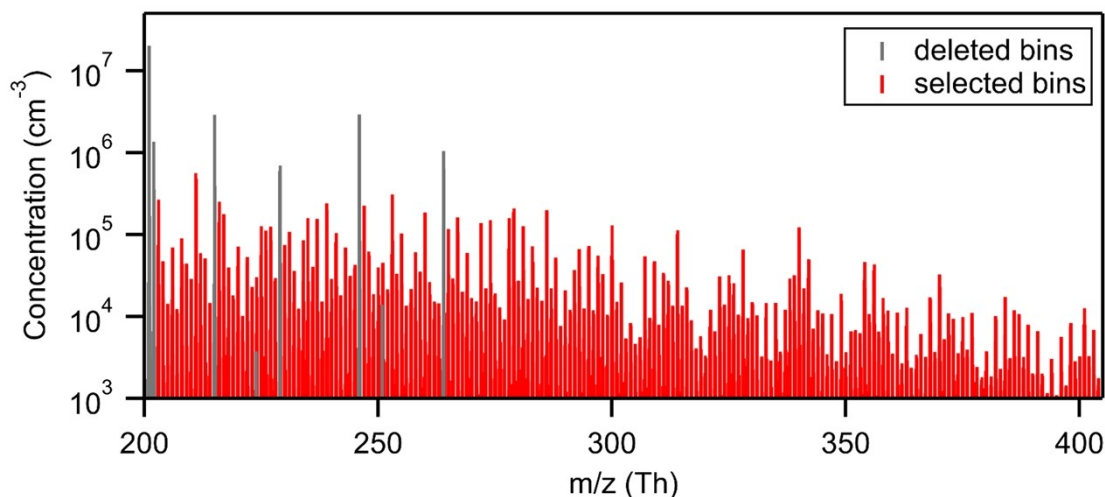

39

40 Fig. S2 The averaged binned spectrum. The delete bins (gray) listed in Table S1, other  
41 bins (red) with unit m/z in the range of 203-404 Th were adopted as data matrix for  
42 PMF inputs.

43

#### 44 Error matrix

45

46 The error matrix was calculated by Eq. (1)<sup>2</sup>

47

48 
$$S_{ij} = \sigma_{ij} + \sigma_{noise} \quad (1)$$

49

50 where  $S_{ij}$  is estimated the measurement uncertainty of  $m/z$   $j$  at time  $i$ ,  $\sigma_{ij}$  represents the  
51 analytical uncertainty from counting statistics and  $\sigma_{noise}$  is the standard deviation of  
52 instrument noise.  $\sigma_{ij}$  is estimated as follows:

53

$$\sigma_{ij} = a \times \frac{\sqrt{I_{ij}}}{\sqrt{t}} \quad (2)$$

54

55

56 where  $I$  is the signal intensity term, in unit of ions per second;  $t$  stands for length of  
57 averaging in seconds, and  $a$  is an empirical coefficient to compensate for unaccounted  
58 uncertainties<sup>3, 4</sup> and is 1.28 in this study as previously estimated from laboratory  
59 experiments<sup>4</sup>. The  $\sigma$  term was estimated as the median of the standard deviations from  
60 signals in the bins in the region between nominal masses, where no physically  
61 meaningful signals are expected.

62

## 63 **S2.2 Diagnostics**

64

65 It is the most critical to select a proper number of factors towards interpreting the PMF  
66 results. The  $Q/Q_{exp}$  value is one of the main mathematical diagnoses to PMF results<sup>4-6</sup>.  
67 For our PMF result, when the number of factor solution exceeds 8, the rate of decline  
68 in  $Q/Q_{exp}$  value slowed down (Fig. S3(a)). The unexplained fraction decreased from  
69 20% to 10% from 1- to 8-factor solution and then decreased slowly in subsequent  
70 solutions (Fig. S3(b)). Based on the mathematical diagnostics, we should select an  
71 appropriate solution from 9-20 factors. The evolution of PMF solutions should been  
72 noticed carefully, since solutions with more factors can interpret subtler processes, but  
73 too many factors will split a significant factor into unrealistic ones. The main factors  
74 with first occurrences are marked in the corresponding solutions (Fig. S3 (a)). As we  
75 can see, the  $O_3$ -related-I factor is separated first in the 3-factor solution, while the  $O_3$ -  
76 related-II factor first appear purely in the 12-factor solution and the MT-mixed-OOM  
77 factor is separated first in the 13-factor solution. For more than 14-factor solutions, this  
78 is more difficult to interpret because they do not provide new physically meaningful  
79 factor and will make the main factor split and uncorrelated with external tracers.

80

81 We used the rotational ambiguity with setting the  $f_{peak}$  to increase from -1.0 to 1.0  
82 with a difference of 0.2 to check the 13-factor solution (Fig. S3(c)). All solutions are  
83 divided into two type solutions, one containing 12 + 'MT-mixed-OOM' factors and the  
84 other containing 12 + 'NP-mixed' factors. The 'MT-mixed-OOM' factor contains  
85 potential monoterpene-derived OOMs mixing other anthropogenic OOMs. The 'NP-  
86 mixed' factor consists of mainly by nitrated phenol which are not our main concern.  
87 Finally, the solution with a  $f_{peak}$  value of -0.2 is selected to analysis data. It is currently  
88 difficult to prove that the PMF solution we chose is optimal, but it is certain that this  
89 solution separates enough information for understanding OOMs.

90

91 Meanwhile, it is should be point out that when naming these factors, we prioritize the  
92 description of dominated species or their precursors, but if the precursors are complex

93 mixtures, our naming highlights the characteristics of the chemical processes that  
 94 drive certain factors.

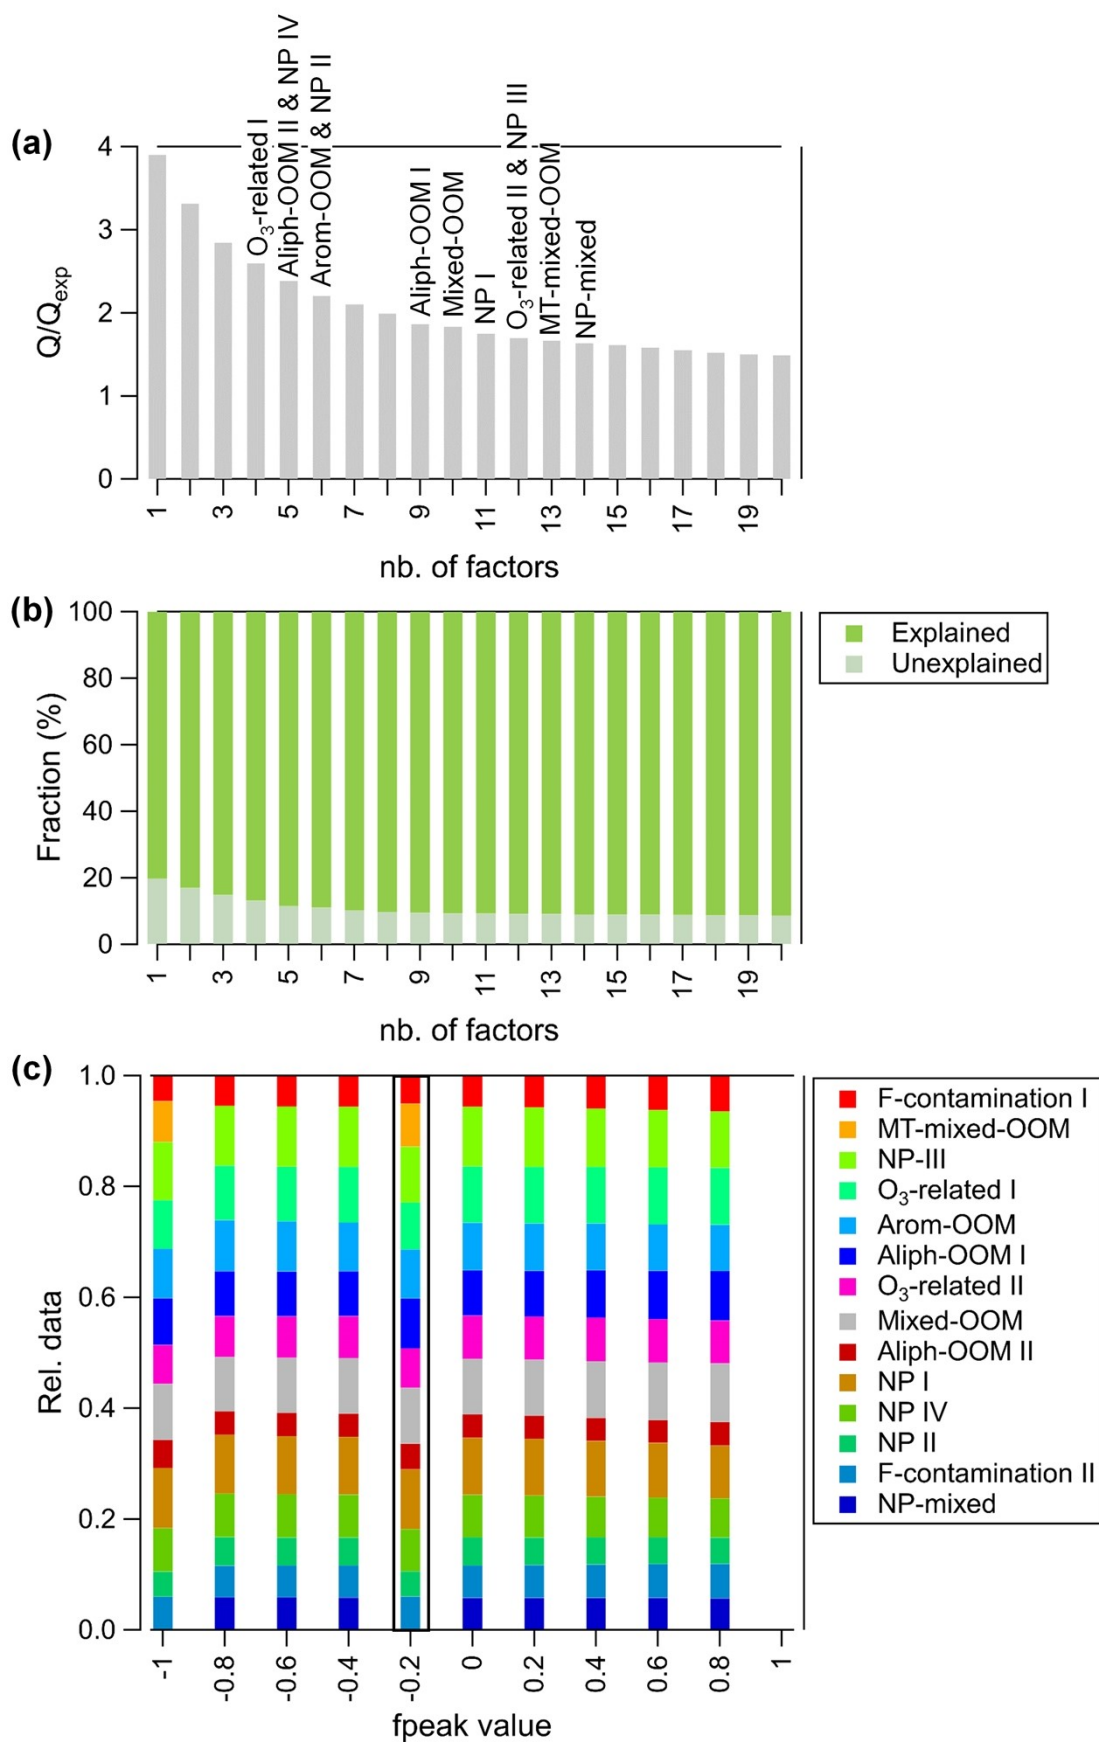

96 Fig. S3 The diagnostics of PMF solution. (a)  $Q/Q_{exp}$ , (b) the explained and unexplained  
97 fraction in PMF results, (c) the relative contribution ratio of factors in each solution  
98 with different values  $([-1,1])$  of  $f_{peak}$ .

99

100 The residual histograms are a simple and fast method for checking whether the PMF  
101 result contains several systematic under- or overestimation. As showed in Fig. S4, the  
102 variables of residual appear some compounds with high signal, but we found the most  
103 of them are the nitrated phenols like  $C_6H_3ClNO_5^-$  ( $m/z = 203.9705$  Th),  $C_6H_5NO_4$   
104 ( $NO_3^-$ ) ( $m/z = 217.102$  Th),  $C_7H_7NO_4$  ( $NO_3^-$ ) ( $m/z = 231.0259$ Th) and  
105  $C_6H_4ClNO_3(NO_3^-)$  ( $m/z = 234.9763$ Th), etc. It is over-split for other physically  
106 significant factors if we separate out these compounds. Therefore, it is appropriate to  
107 choose the 14-factor solution since the factors about nitrated phenols are not our main  
108 concern.

109

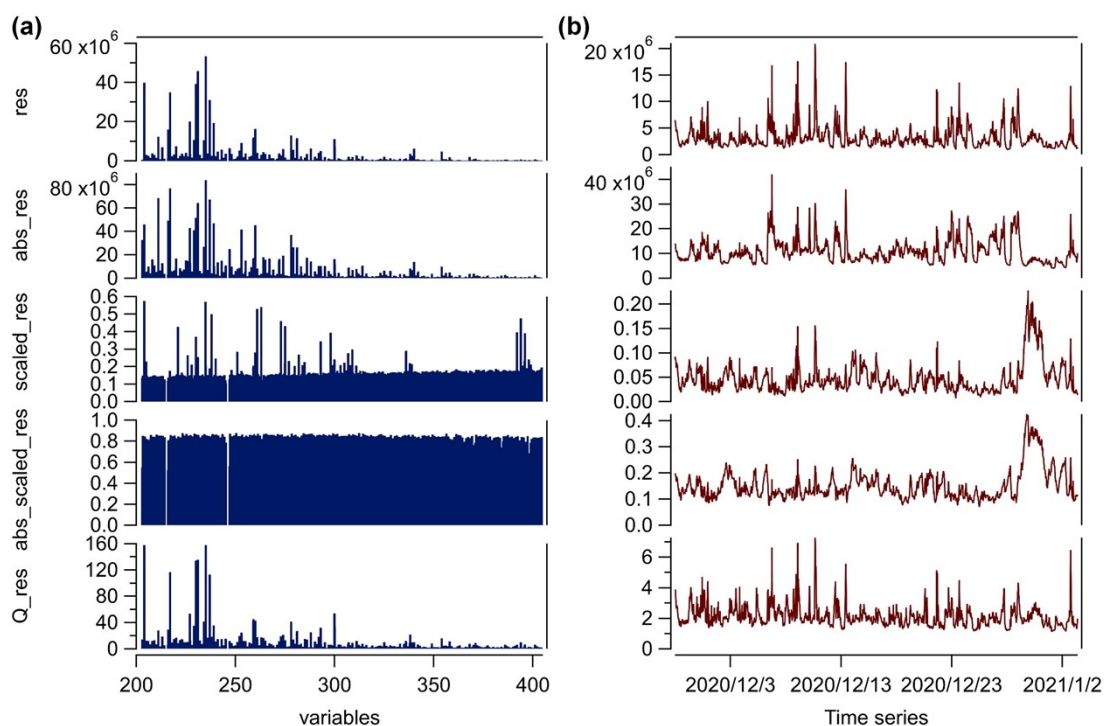

110

111 Fig. S4 (a) Mass spectra and (b) time series plots showing the residual histograms of  
112 the 13-factor solution.

113

### 114 S2.3 The binPMF result

115

116 In summary, we selected 13-factor solution to analysis our dataset.

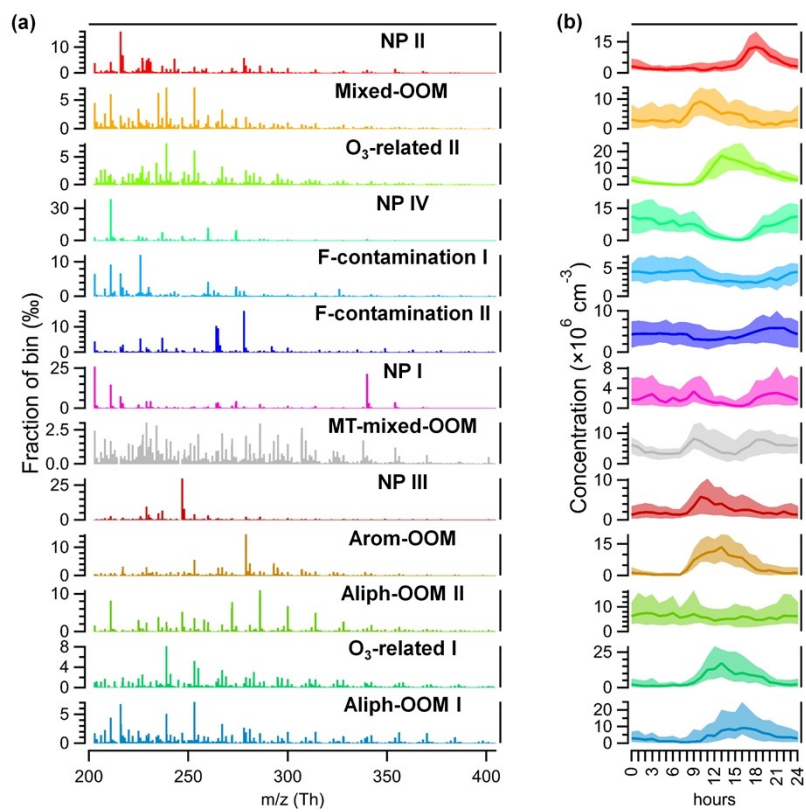

117  
 118 Fig. S5. The binPMF analysis with 13-factor solution. (a) the mass profile, (b) the  
 119 diurnal pattern.  
 120

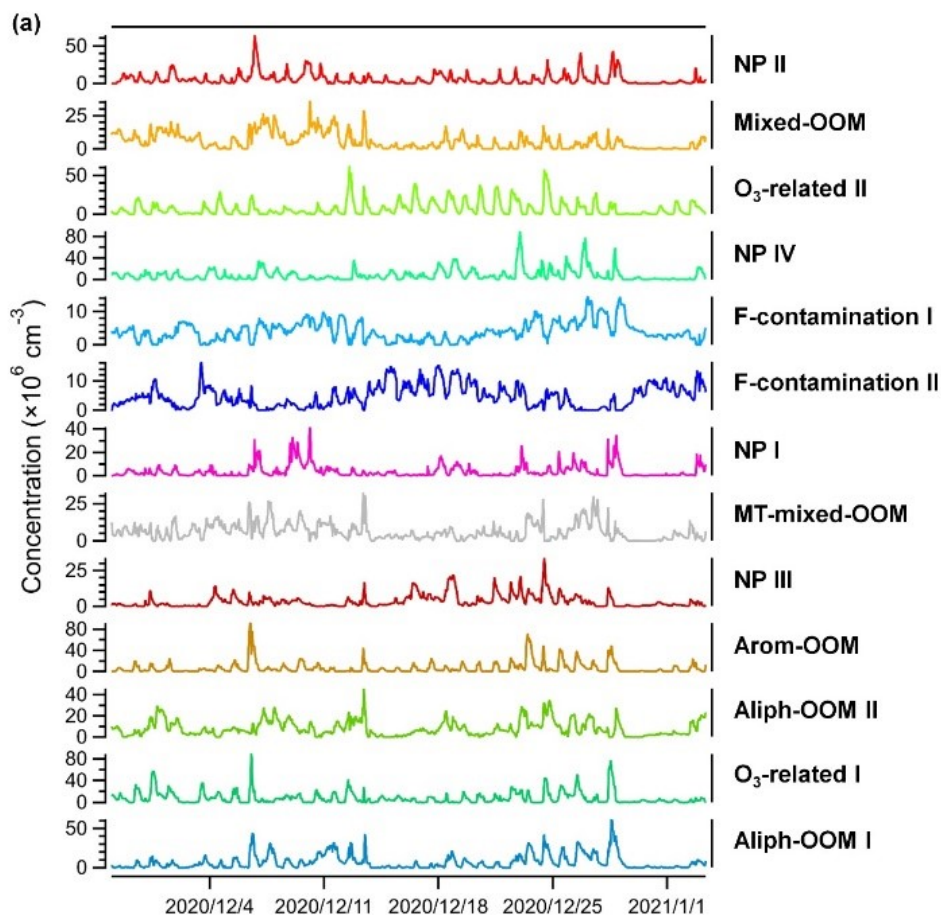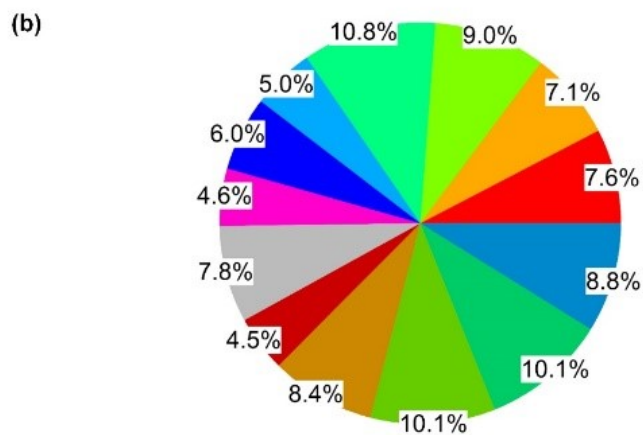

121  
 122 Fig. S6 The binPMF result. (a) the time series, (b) the contribution of each factor to the  
 123 total signal.  
 124

1: NP II 2: Mixed-OOM 3: O<sub>3</sub>-related II 4: NP IV 5: F-contamination I 6: F-contamination II  
 7: NP I 8: MT-mixed-OOM 9: NP III 10: Arom-OOM 11: Aliph-OOM II  
 12: O<sub>3</sub>-related II 13: Aliph-OOM I

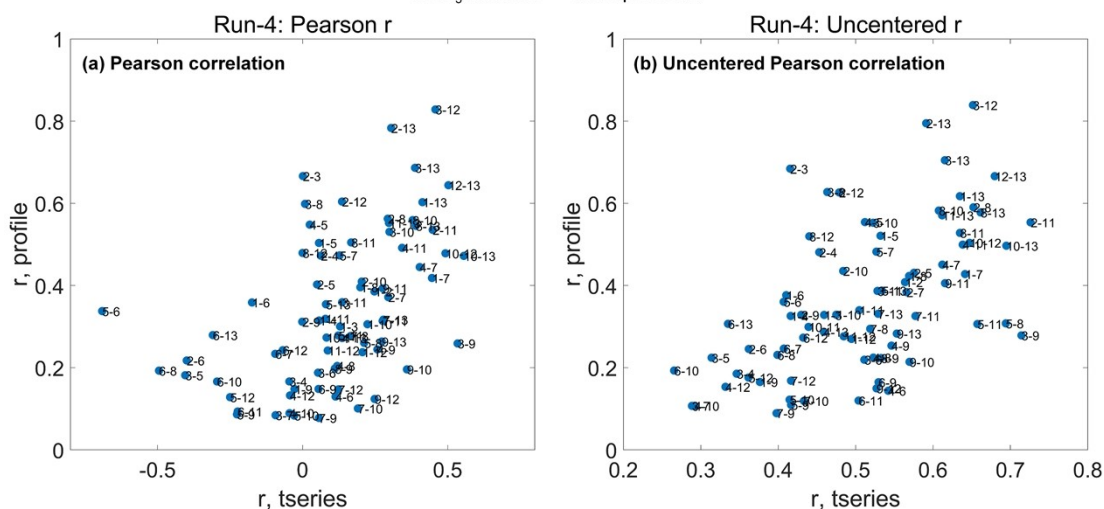

125  
 126 Fig. S7 Comparison among the factors through (a) Pearson correlation and (b)  
 127 Uncentered Pearson correlation. The x-axis shows the correlation of the time series  
 128 between the factors, and the y-axis shows the correlation of the spectra between the  
 129 factors.

130

### 131 S3 Calculation of molecular properties of OOMs

#### 132 Carbon oxidation state (OS<sub>c</sub>)

133

134 The OS<sub>c</sub> of each **non-nitro** OOM was calculated based on Eq. (3) modified from that  
 135 in Kroll et al.<sup>7</sup> include organic nitrate contributions:

136

$$137 \quad OS_{c=2} = (n_O - 3n_N)/n_C - n_H/n_C + n_N/n_C \quad (3)$$

138

139 Where  $n_C$ ,  $n_H$ ,  $n_O$ , and  $n_N$  denote the number of carbons, hydrogen, oxygen, and nitrogen  
 140 in the molecule, respectively.

141

#### 142 Double bond equivalent (DBE)

143

144 The DBE of each OOM was calculated using Eq. (4), by assuming that all nitrogen  
 145 come from the nitrate group (-ONO<sub>2</sub>) or nitro group (-NO<sub>2</sub>). Here DBE represents the  
 146 combined effect of double or triple bonds, as well as the ring structure, in the molecule.

147

$$148 \quad DBE = n_C + 1 - (n_H + n_N)/2 \quad (4)$$

149

#### 150 Volatility Basis Set (VBS)

151



152 The saturation concentration (volatility) of selected OOMs was estimated based on the  
 153 group-contribution method proposed by Donahue et al.<sup>8</sup>:  
 154

$$155 \log_{10} C^*(300K) = (25 - n_C) \times b_C - (n_O - 2n_N) \times b_O - 2 \left[ \frac{(n_O - 2n_N) \times n_C}{n_C + n_O - 2n_N} \right] \times b_{CO}$$

156 (5)

157  
 158 Where  $b_C = 0.475$ ,  $b_O = 2.3$ ,  $b_{CO} = -0.3$ . The effect of nitrate group (-ONO<sub>2</sub>) on volatility  
 159 is similar to hydroxyl group (-OH).

160  
 161 The temperature dependence of volatilities is described by Eq. (6), according to  
 162 Stolzenburg et al.<sup>9</sup>:

$$163 \log_{10} C_i^*(T) = \log_{10} C_i^*(300K) + \frac{\Delta H_{vap}}{R \times \ln(10)} \left( \frac{1}{300} - \frac{1}{T} \right)$$

164 (6)

165  
 166 The evaporation enthalpy ( $\Delta H_{vap}$ ) can be linked to the saturation mass concentration at  
 167 300 K,  $\log_{10} C^*(300K)$ , according to Donahue et al.<sup>8</sup> and combined with Epstein et al.<sup>10</sup>:

$$168 \Delta H_{vap} [kJ mol^{-1}] = 129 - 5.7 \cdot \log_{10}(C^*(300K))$$

169 (7)

### 171 Effective Oxygen Number ( $n_{O_{eff}}$ )

172  
 173 The effective oxygen number which represents effective oxidation was calculated by  
 174 Eq. (8), by assuming that all nitrogen of **non-nitro** OOM come from the nitrate group  
 175 (-ONO<sub>2</sub>):

$$176 n_{O_{eff}} = n_O - 2 \times n_N$$

177 (8)

## 179 S4 Main peaks of 7 discussed non-nitrated-phenols factors

### 180 S4.1 Arom-OOM factor

181  
 182 Table S2. Molecular characteristics of the Arom-OOM factor. Presented as several sets  
 183 of compounds, and the members of each set differ in the addition of a -CH<sub>2</sub> moiety.  
 184 Only the signals that account for more than one thousandth of the factor are selected to  
 185 reduce uncertainties. The clustering reagent ion NO<sub>3</sub><sup>-</sup> or HNO<sub>3</sub>NO<sub>3</sub><sup>-</sup> has been omitted  
 186 from the formulas.

187

| No. | Formulas                                                                  | Contribution to the factor (%) | DBE | $n_O$ | $n_N$ |
|-----|---------------------------------------------------------------------------|--------------------------------|-----|-------|-------|
| 1   | C <sub>x</sub> H <sub>2x-5</sub> O <sub>6</sub> N, x= [6, 12]             | 15.0                           | 3   | 6     | 1     |
| 2   | C <sub>x</sub> H <sub>2x-3</sub> O <sub>6</sub> N, x= [6, 12]             | 8.8                            | 2   | 6     | 1     |
| 3   | C <sub>x</sub> H <sub>2x</sub> O <sub>7</sub> N <sub>2</sub> , x= [4, 14] | 5.5                            | 0   | 7     | 2     |

|    |                                   |     |   |   |   |
|----|-----------------------------------|-----|---|---|---|
| 4  | $C_xH_{2x-5}O_7N$ , $x = [7, 11]$ | 3.9 | 3 | 7 | 1 |
| 5  | $C_xH_{2x-1}O_5N$ , $x = [4, 14]$ | 3.9 | 1 | 5 | 1 |
| 6  | $C_xH_{2x+1}O_5N$ , $x = [4, 13]$ | 3.4 | 0 | 5 | 1 |
| 7  | $C_xH_{2x-1}O_6N$ , $x = [4, 12]$ | 3.1 | 1 | 6 | 1 |
| 8  | $C_xH_{2x-5}O_8N$ , $x = [7, 11]$ | 2.5 | 3 | 8 | 1 |
| 9  | $C_xH_{2x-3}O_7N$ , $x = [6, 10]$ | 2.2 | 2 | 7 | 1 |
| 10 | $C_xH_{2x-3}O_5N$ , $x = [7, 13]$ | 1.9 | 2 | 5 | 1 |

188

#### 189 S4.2 Aliph-OOM-I factor

190

191 Table S3. Molecular characteristics of the Aliph-OOM I factor. Presented as several  
 192 sets of compounds, and the members of each set differ in the addition of a  $-CH_2$  moiety.  
 193 Only the signals that account for more than one thousandth of the factor are selected to  
 194 reduce uncertainties. The clustering reagent ion  $NO_3^-$  or  $HNO_3NO_3^-$  has been omitted  
 195 from the formulas.

196

| No. | Formulas                            | Contribution to the factor (%) | DBE | $n_O$ | $n_N$ |
|-----|-------------------------------------|--------------------------------|-----|-------|-------|
| 1   | $C_xH_{2x-3}O_6N$ , $x = [5, 13]$   | 12.6                           | 2   | 6     | 1     |
| 2   | $C_xH_{2x}O_7N_2$ , $x = [4, 14]$   | 9.9                            | 0   | 7     | 2     |
| 3   | $C_xH_{2x-1}O_5N$ , $x = [4, 14]$   | 6.8                            | 1   | 5     | 1     |
| 4   | $C_xH_{2x-2}O_8N_2$ , $x = [5, 13]$ | 5.0                            | 1   | 8     | 2     |
| 5   | $C_xH_{2x-1}O_6N$ , $x = [5, 12]$   | 3.8                            | 1   | 6     | 1     |
| 6   | $C_xH_{2x-4}O_4$ , $x = [6, 11]$    | 2.8                            | 3   | 4     | 0     |
| 7   | $C_xH_{2x-2}O_7N_2$ , $x = [6, 14]$ | 2.1                            | 1   | 7     | 2     |
| 8   | $C_xH_{2x-5}O_6N$ , $x = [6, 12]$   | 2.1                            | 3   | 6     | 1     |
| 9   | $C_xH_{2x-2}O_4$ , $x = [6, 10]$    | 2.1                            | 2   | 4     | 0     |
| 10  | $C_xH_{2x-3}O_7N$ , $x = [6, 12]$   | 1.7                            | 2   | 7     | 1     |

197

#### 198 S4.3 Aliph-OOM-II factor

199

200 Table S4. Molecular characteristics of the Aliph-OOM II factor. Presented as several  
 201 sets of compounds, and the members of each set differ in the addition of a  $-CH_2$  moiety.  
 202 Only the signals that account for more than one thousandth of the factor are selected to  
 203 reduce uncertainties. The clustering reagent ion  $NO_3^-$  or  $HNO_3NO_3^-$  has been omitted  
 204 from the formulas.

205

| No. | Formulas                            | Contribution to the factor (%) | DBE | $n_O$ | $n_N$ |
|-----|-------------------------------------|--------------------------------|-----|-------|-------|
| 1   | $C_xH_{2x}O_7N_2$ , $x = [4, 13]$   | 25.3                           | 0   | 7     | 2     |
| 2   | $C_xH_{2x-1}O_5N$ , $x = [4, 10]$   | 6.7                            | 1   | 6     | 1     |
| 3   | $C_xH_{2x-2}O_8N_2$ , $x = [5, 13]$ | 6.2                            | 1   | 8     | 2     |
| 4   | $C_xH_{2x-3}O_6N$ , $x = [5, 10]$   | 5.0                            | 2   | 6     | 1     |

|    |                                     |     |   |    |   |
|----|-------------------------------------|-----|---|----|---|
| 5  | $C_xH_{2x-2}O_7N_2$ , x= [5, 13]    | 4.3 | 1 | 7  | 2 |
| 6  | $C_xH_{2x-1}O_9N_3$ , x= [5, 11]    | 2.0 | 0 | 9  | 3 |
| 7  | $C_xH_{2x-4}O_8N_2$ , x= [7, 12]    | 1.9 | 2 | 8  | 2 |
| 8  | $C_xH_{2x-1}O_{10}N_3$ , x= [5, 10] | 1.2 | 0 | 10 | 3 |
| 9  | $C_xH_{2x+1}O_5N$ , x= [4, 8]       | 1.2 | 0 | 5  | 1 |
| 10 | $C_xH_{2x-1}O_6N$ , x= [5, 9]       | 1.2 | 1 | 6  | 1 |

206

207 **S4.4 O<sub>3</sub>-related-I factor**

208

209 Table S5. Molecular characteristics of the O<sub>3</sub>-related I factor. Presented as several sets  
 210 of compounds, and the members of each set differ in the addition of a -CH<sub>2</sub> moiety.  
 211 Only the signals that account for more than one thousandth of the factor are selected to  
 212 reduce uncertainties. The clustering reagent ion NO<sub>3</sub><sup>-</sup> or HNO<sub>3</sub>NO<sub>3</sub><sup>-</sup> has been omitted  
 213 from the formulas.

214

| No. | Formulas                         | Contribution to the factor (%) | DBE | $n_O$ | $n_N$ |
|-----|----------------------------------|--------------------------------|-----|-------|-------|
| 1   | $C_xH_{2x-3}O_6N$ , x= [4, 12]   | 12.1                           | 2   | 6     | 1     |
| 2   | $C_xH_{2x-1}O_6N$ , x= [4, 11]   | 7.2                            | 1   | 6     | 1     |
| 3   | $C_xH_{2x-3}O_7N$ , x= [4, 11]   | 6.0                            | 2   | 7     | 1     |
| 4   | $C_xH_{2x-2}O_8N_2$ , x= [4, 13] | 5.9                            | 1   | 8     | 2     |
| 5   | $C_xH_{2x-5}O_7N$ , x= [6, 11]   | 3.3                            | 3   | 7     | 1     |
| 6   | $C_xH_{2x-5}O_8N$ , x= [7, 11]   | 3.1                            | 3   | 8     | 1     |
| 7   | $C_xH_{2x-5}O_6N$ , x= [6, 10]   | 2.7                            | 3   | 6     | 1     |
| 8   | $C_xH_{2x}O_8N_2$ , x= [4, 11]   | 2.5                            | 0   | 8     | 2     |
| 9   | $C_xH_{2x-2}O_9N_2$ , x= [4, 11] | 2.0                            | 1   | 9     | 2     |
| 10  | $C_xH_{2x-4}O_8N_2$ , x= [6, 13] | 1.9                            | 2   | 8     | 2     |

215

216 **S4.5 O<sub>3</sub>-related-II factor**

217

218 Table S6. Molecular characteristics of the O<sub>3</sub>-related II factor. Presented as several sets  
 219 of compounds, and the members of each set differ in the addition of a -CH<sub>2</sub> moiety.  
 220 Only the signals that account for more than one thousandth of the factor are selected to  
 221 reduce uncertainties. The clustering reagent ion NO<sub>3</sub><sup>-</sup> or HNO<sub>3</sub>NO<sub>3</sub><sup>-</sup> has been omitted  
 222 from the formulas.

223

| No. | Formulas                       | Contribution to the factor (%) | DBE | $n_O$ | $n_N$ |
|-----|--------------------------------|--------------------------------|-----|-------|-------|
| 1   | $C_xH_{2x-3}O_6N$ , x= [4, 10] | 11.3                           | 2   | 6     | 1     |
| 2   | $C_xH_{2x-1}O_6N$ , x= [4, 9]  | 4.9                            | 1   | 6     | 1     |
| 3   | $C_xH_{2x-4}O_4$ , x= [6, 10]  | 4.7                            | 3   | 4     | 0     |
| 4   | $C_xH_{2x-3}O_7N$ , x= [4, 10] | 4.1                            | 2   | 7     | 1     |
| 5   | $C_xH_{2x-4}O_5$ , x= [5, 10]  | 3.8                            | 3   | 5     | 0     |

|    |                                   |     |   |   |   |
|----|-----------------------------------|-----|---|---|---|
| 6  | $C_xH_{2x}O_7N_2$ , $x = [4, 10]$ | 3.5 | 0 | 7 | 2 |
| 7  | $C_xH_{2x-5}O_6N$ , $x = [5, 10]$ | 3.1 | 3 | 6 | 1 |
| 8  | $C_xH_{2x-5}O_7N$ , $x = [5, 10]$ | 2.8 | 3 | 7 | 1 |
| 9  | $C_xH_{2x-6}O_5$ , $x = [6, 10]$  | 2.8 | 4 | 5 | 0 |
| 10 | $C_xH_{2x-2}O_4$ , $x = [6, 9]$   | 2.4 | 2 | 4 | 0 |

224

#### 225 S4.6 MT-mixed-OOM factor

226

227 Table S7. Molecular characteristics of the MT-mixed-OOM factor. Presented as several  
 228 sets of compounds, and the members of each set differ in the addition of a  $-CH_2$  moiety.  
 229 Only the signals that account for more than one thousandth of the factor are selected to  
 230 reduce uncertainties. The clustering reagent ion  $NO_3^-$  or  $HNO_3NO_3^-$  has been omitted  
 231 from the formulas.

232

| No. | Formulas                            | Contribution to the factor (%) | DBE | $n_O$ | $n_N$ |
|-----|-------------------------------------|--------------------------------|-----|-------|-------|
| 1   | $C_xH_{2x-3}O_6N$ , $x = [5, 12]$   | 5.0                            | 2   | 6     | 1     |
| 2   | $C_xH_{2x-1}O_5N$ , $x = [4, 13]$   | 4.8                            | 1   | 5     | 1     |
| 3   | $C_xH_{2x}O_7N_2$ , $x = [5, 10]$   | 4.7                            | 0   | 7     | 2     |
| 4   | $C_xH_{2x-5}O_6N$ , $x = [6, 12]$   | 4.6                            | 3   | 6     | 1     |
| 5   | $C_xH_{2x-4}O_4$ , $x = [6, 11]$    | 3.5                            | 3   | 4     | 0     |
| 6   | $C_xH_{2x-1}O_6N$ , $x = [4, 11]$   | 3.4                            | 1   | 6     | 1     |
| 7   | $C_xH_{2x+1}O_5N$ , $x = [4, 10]$   | 3.2                            | 0   | 5     | 1     |
| 8   | $C_xH_{2x-3}O_5N$ , $x = [4, 12]$   | 2.9                            | 2   | 5     | 1     |
| 9   | $C_xH_{2x-2}O_4$ , $x = [6, 9]$     | 2.0                            | 2   | 4     | 0     |
| 10  | $C_xH_{2x-4}O_7N_2$ , $x = [9, 10]$ | 1.5                            | 2   | 7     | 2     |

233

#### 234 S4.7 Mixed-OOM factor

235

236 Table S8. Molecular characteristics of the Mixed-OOM factor. Presented as several sets  
 237 of compounds, and the members of each set differ in the addition of a  $-CH_2$  moiety.  
 238 Only the signals that account for more than one thousandth of the factor are selected to  
 239 reduce uncertainties. The clustering reagent ion  $NO_3^-$  or  $HNO_3NO_3^-$  has been omitted  
 240 from the formulas.

241

| No. | Formulas                            | Contribution to the factor (%) | DBE | $n_O$ | $n_N$ |
|-----|-------------------------------------|--------------------------------|-----|-------|-------|
| 1   | $C_xH_{2x-3}O_6N$ , $x = [4, 11]$   | 11.1                           | 2   | 6     | 1     |
| 2   | $C_xH_{2x-1}O_5N$ , $x = [4, 12]$   | 8.2                            | 1   | 5     | 1     |
| 3   | $C_xH_{2x-5}O_6N$ , $x = [6, 11]$   | 3.3                            | 3   | 6     | 1     |
| 4   | $C_xH_{2x-2}O_8N_2$ , $x = [5, 10]$ | 2.5                            | 1   | 8     | 2     |
| 5   | $C_xH_{2x}O_7N_2$ , $x = [5, 12]$   | 2.5                            | 0   | 7     | 2     |
| 6   | $C_xH_{2x-1}O_6N$ , $x = [4, 8]$    | 2.1                            | 1   | 6     | 1     |

|    |                                |     |   |   |   |
|----|--------------------------------|-----|---|---|---|
| 7  | $C_xH_{2x-2}O_4$ , x= [6, 9]   | 2.1 | 2 | 4 | 0 |
| 8  | $C_xH_{2x-3}O_5N$ , x= [4, 12] | 1.8 | 2 | 5 | 1 |
| 9  | $C_xH_{2x-4}O_4$ , x= [6, 10]  | 1.7 | 3 | 4 | 0 |
| 10 | $C_xH_{2x-6}O_4$ , x= [6, 8]   | 1.3 | 4 | 4 | 0 |

242 **S5 The additional information of the Arom-OOM factor**

243 The aromatic oxidation proxy represents the aromatic photo-oxidation and can calculate  
 244 by Eq. (9):

245

$$246 \quad \text{Aromatic oxidation proxy} = k_{OH} \times \text{Aromatics} \times J(O^1D) \quad (9)$$

247

248 Where  $k_{OH}$  is a reaction constant for the photo-oxidation of aromatics.

249

250 Here, we add the OH reactivity of monoterpenes to analysis.

251

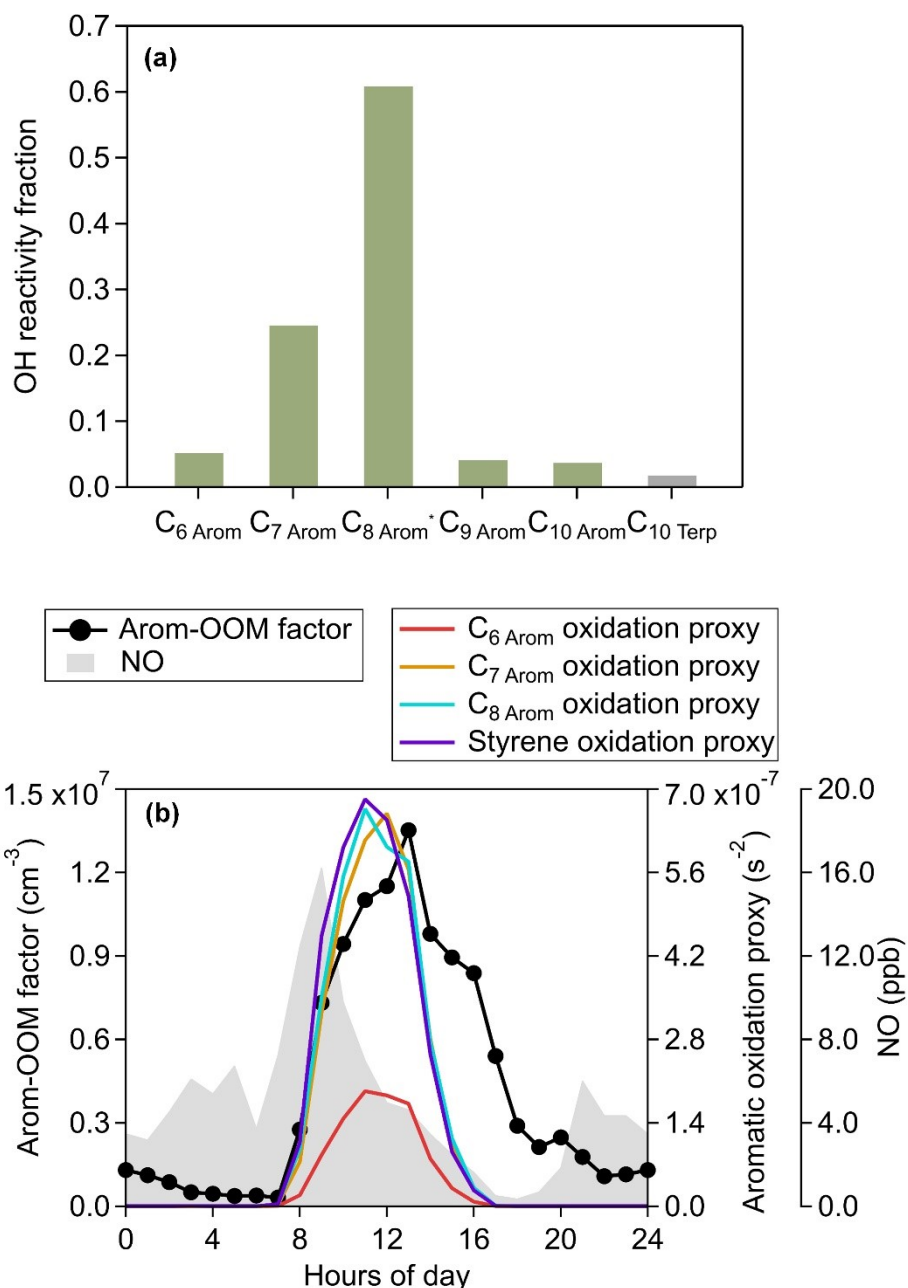

252  
 253 Fig. S8 The analysis of the Arom-OOM factor. (a) The OH reactivity distribution of C<sub>6</sub>  
 254 Arom, C<sub>7</sub> Arom, C<sub>8</sub> Arom\*, C<sub>9</sub> Arom, C<sub>10</sub> Arom and C<sub>10</sub> Terp (Note: C<sub>8</sub> Arom\* = C<sub>8</sub> Arom + Styrene),  
 255 (b) the median diurnal patterns of Arom-OOM factor and C<sub>6</sub> Arom, C<sub>7</sub> Arom, C<sub>8</sub> Arom,  
 256 Styrene oxidation proxy.

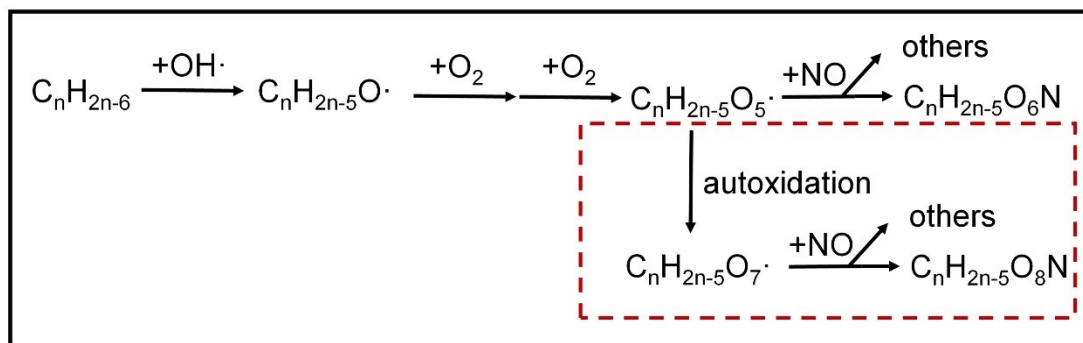

257  
 258 Fig.S9 The potential reaction pathway of the OH-initiated oxidation of aromatics to

259 form  $C_xH_{2x-5}O_6N$  and  $C_xH_{2x-5}O_8N$ .

## 260 S6 The additional information of two Aliph-OOM factors

261 As described in Liu et al.<sup>6</sup>, considering a simple scenario of alkane photo-oxidation  
262 under high  $NO_x$  conditions: the  $RO_2$  generated from OH attack is completely terminated  
263 by NO (Fig. S9(a)). The chain-retaining products are  $C_nH_{2n}O$  (one more carbonyl group  
264 than the precursor) and  $C_nH_{2n+1}O_3N$  (one more nitrate group than the precursor).  
265 Further re-oxidation of these products is a repetition of the same process and the 1<sup>st</sup> -  
266 3<sup>rd</sup> multi-generation products of alkanes summarized in Fig. S9(b) are regarded as  
267 reference compounds, which we compare OOMs with to investigate other mechanisms

268 that differ from those shown in Fig. S9(a). The number of extra oxygen ( $n_{O_{extra}}$ ) from  
269 each aliphatic OOM over its corresponding reference molecule was calculated by Eq.

270 (10). The  $n_{O_{extra}}$  can represent the extra oxygenated moieties with other processes.

271

272 The  $n_{O_{extra}}$  is calculated by Eq. (10):

273

$$274 \quad n_{O_{extra}} = n_O - DBE - 3 \times n_N \quad (10)$$

275

276 Where the DBE is calculated based on Eq. (4).

277

278 As showed in Fig. S9(c), two Aliph-OOM factors are mainly dominated by second and  
279 third generation products and Aliph-OOM-I factor contains more carbonyl group while  
280 Aliph-OOM-II factor prefers to contain nitrate groups.

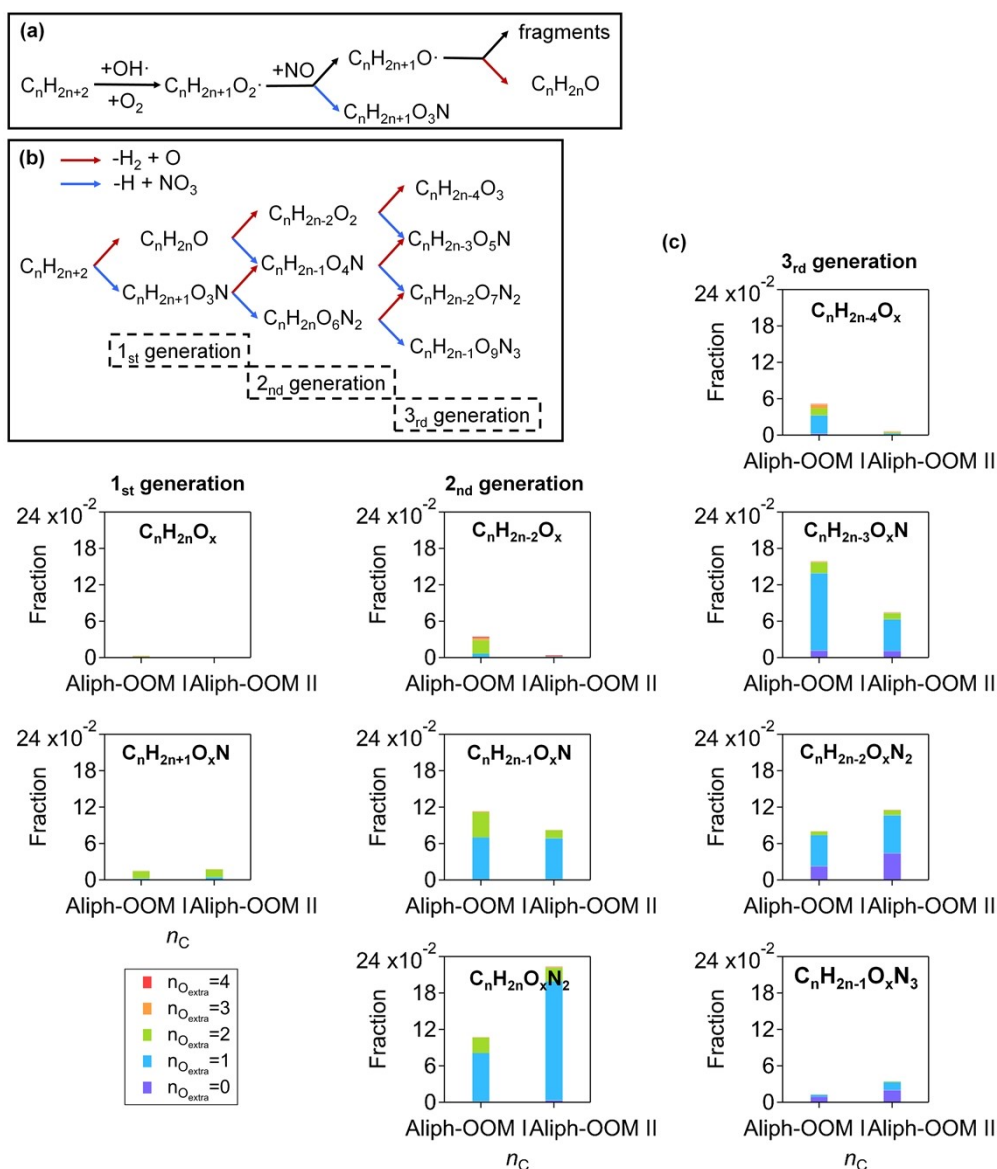

281  
 282 Fig. S10 The multi-generation oxidation of two Aliph-OOM factors. (a) and (b) is  
 283 adopted from Liu et al.<sup>6</sup>. (c) The compounds with same number of carbon, hydrogen,  
 284 and nitrogen atoms but different numbers of oxygen atoms are grouped according to  
 285 the molecular formulas in (b). The bars in (c) are colored with  $n_{O_{extra}}$ .  
 286



287 **S7 The additional information of two O<sub>3</sub>-related factors**

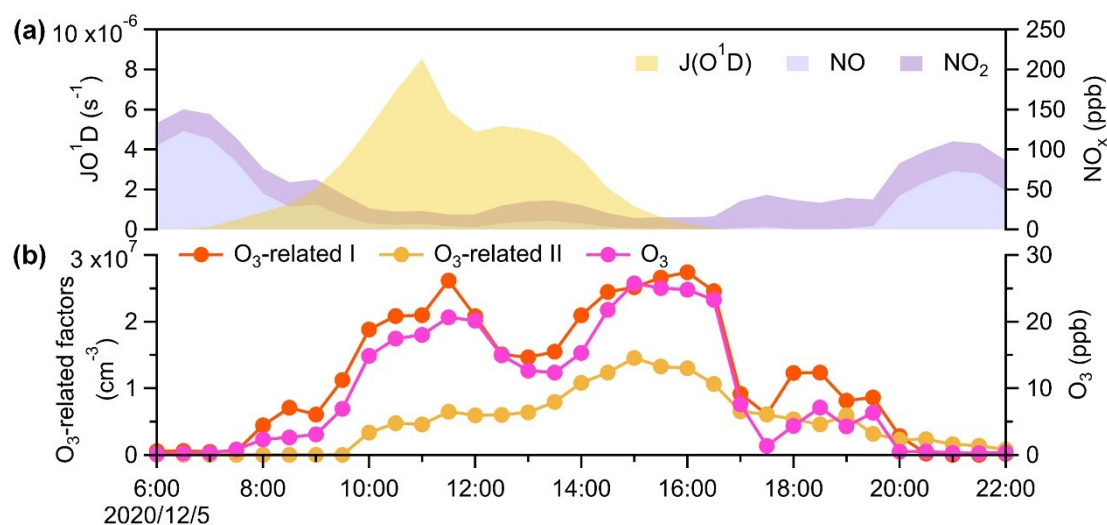

288  
 289 Fig.S11 The time series of select case that O<sub>3</sub>-related factors follow O<sub>3</sub> varies, (a)  
 290 J(O<sup>1</sup>D) and NO<sub>x</sub>, (b) O<sub>3</sub>-related I, O<sub>3</sub>-related II and O<sub>3</sub>.  
 291

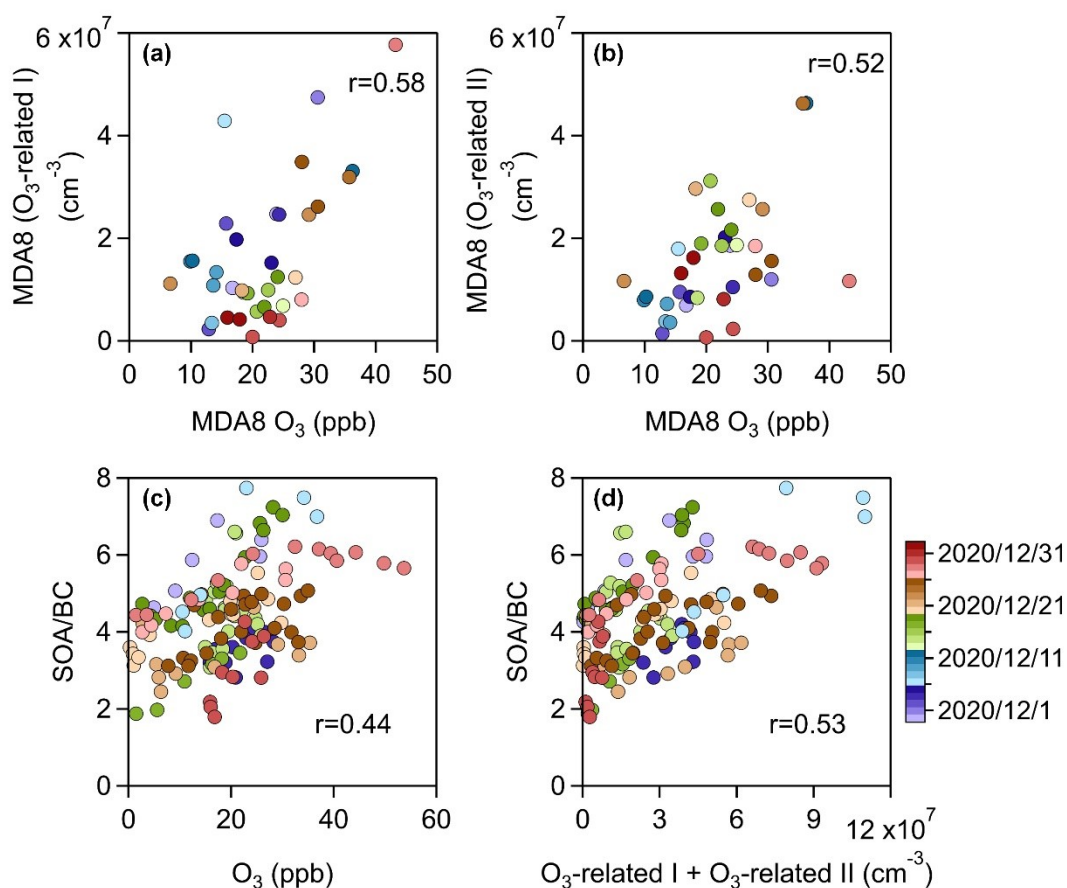

292  
 293 Fig.S12 Scatter plots of (a) the maximum daily 8-h average (MDA8) O<sub>3</sub>-related I , and  
 294 (b) MDA8 O<sub>3</sub>-related II with MDA8 O<sub>3</sub>, secondary organic aerosol(SOA) to black  
 295 carbon(BC) ratio with (c) ozone and (d) two O<sub>3</sub>-related factors in 17 ozone production  
 296 cases.  
 297

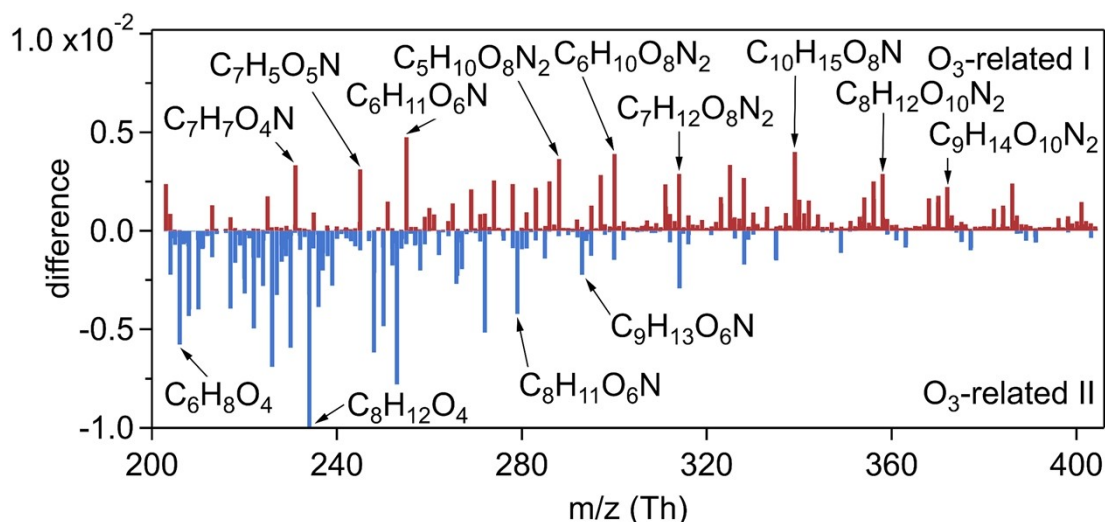

298  
 299 Fig. S13 The difference in mass-to-charge of the O<sub>3</sub>-related-I factor and O<sub>3</sub>-related-II  
 300 factor.  
 301

302 **S8 The additional information of the Mixed-OOM and the MT-mixed-OOM**  
 303 **factors**

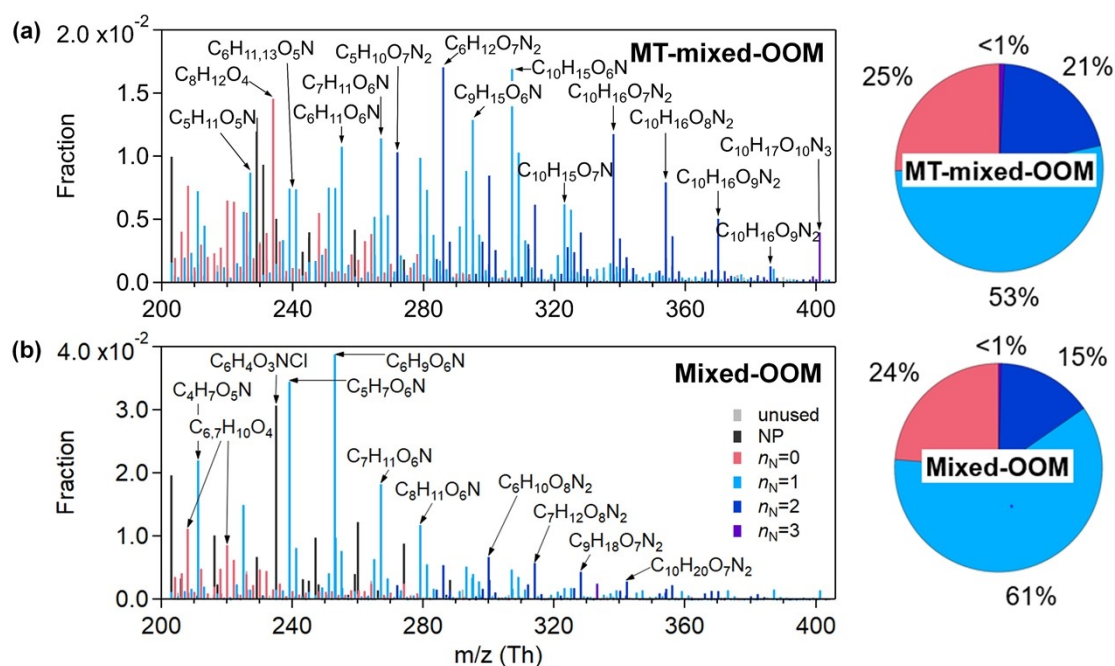

304  
 305 Fig. S14 Profiles of 2 binPMF factors. Mass spectra and pie of (a) the MT-mixed-OOM  
 306 factor, (b) the Mixed-OOM factor. The elemental formulas of major peaks are labeled  
 307 above them. Peaks are color-coded by  $n_N$ , and the fractions of peaks grouped by  $n_N$  are  
 308 reported in the pie chart for each factor. The gray sticks are fluorinated contaminations,  
 309 or non-identified compounds. The nitrated phenols are drawn separately with black  
 310 peaks. So  $n_N$  can more reliably represent the number of nitrate groups in each molecule.  
 311

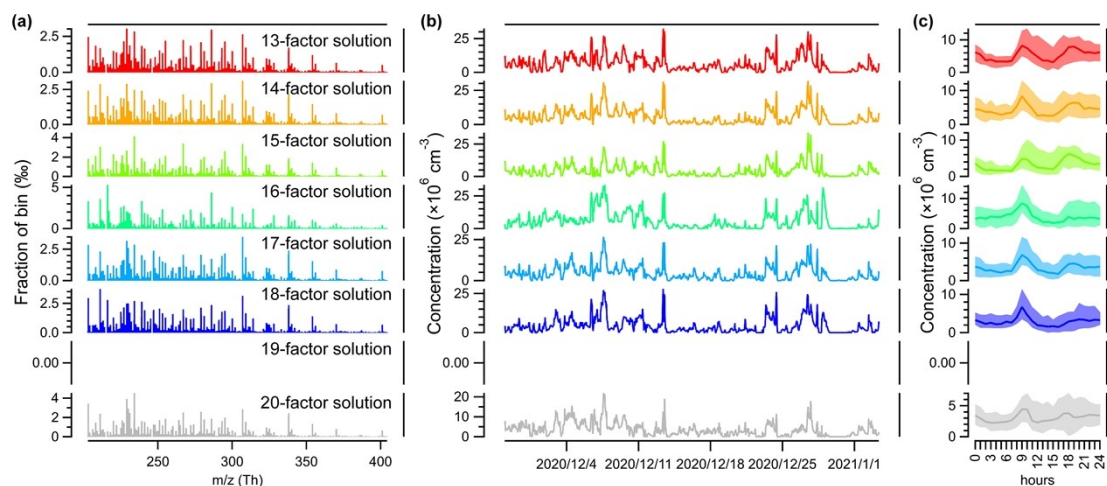

312 Fig. S15 Evolution of the MT-mixed-OOM factor. (a) profiles, (b) time series, and (c)  
 313 diurnal patterns.  
 314  
 315

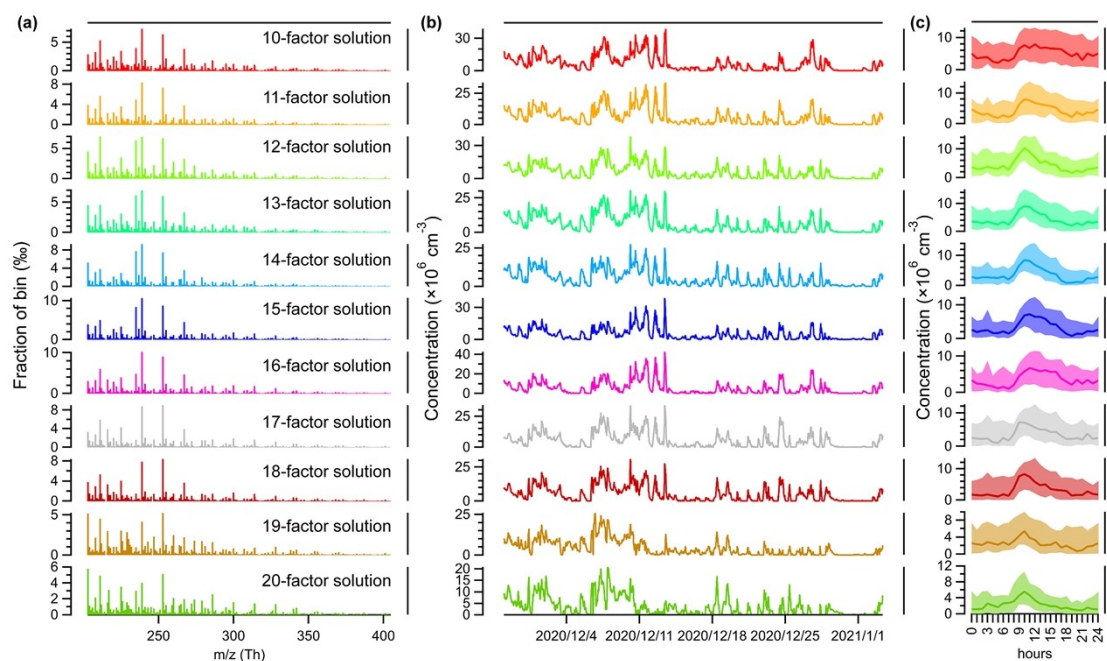

316 Fig. S16 Evolution of the Mixed-OOM factor. (a) profiles, (b) time series, and (c)  
 317 diurnal patterns.  
 318  
 319

320 **S9 The additional information of NP factors**

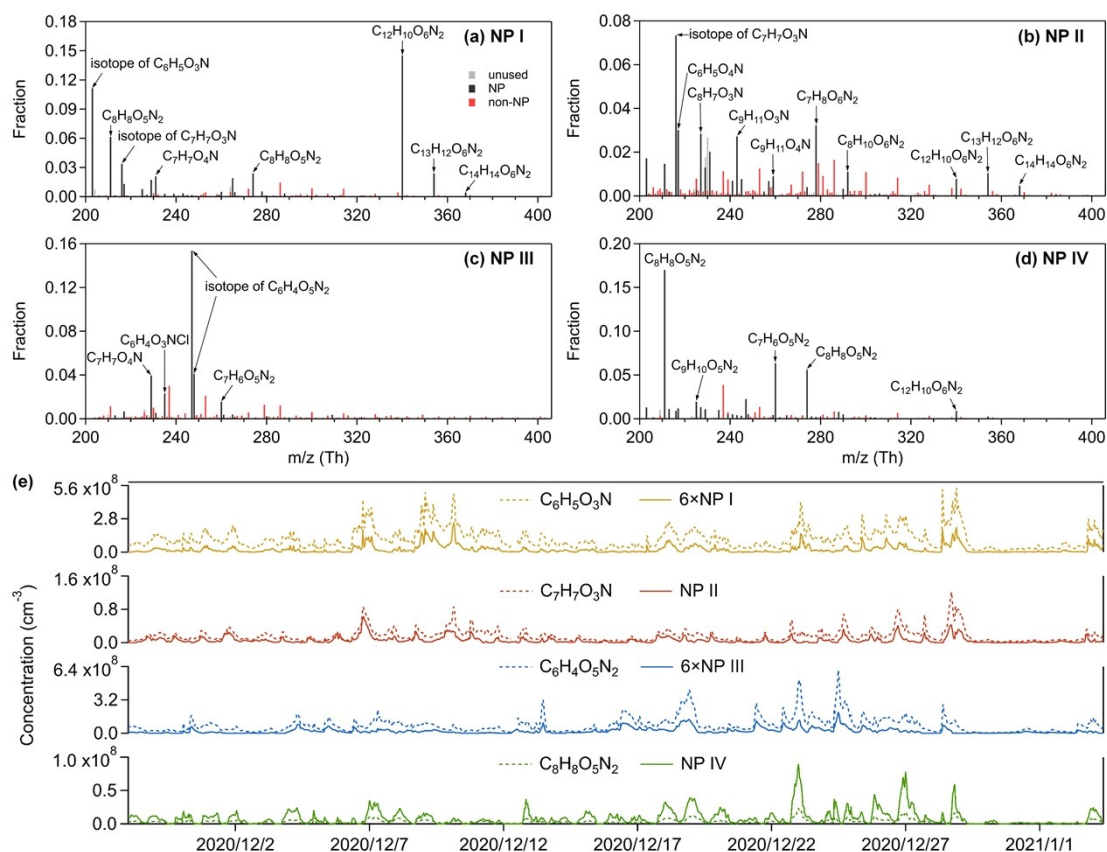

321  
 322 Fig. S17 Profiles of NP factors. Mass spectra and pie of (a) NP-I factor, (b) NP-II factor,  
 323 (c) NP-III, (d) NP-IV. The time series of four factors and their traces was plotted in (e).  
 324 The nitrated phenols are drawn separately with black peaks in (a–d), while other OOMs  
 325 are plotted as red peaks.  
 326

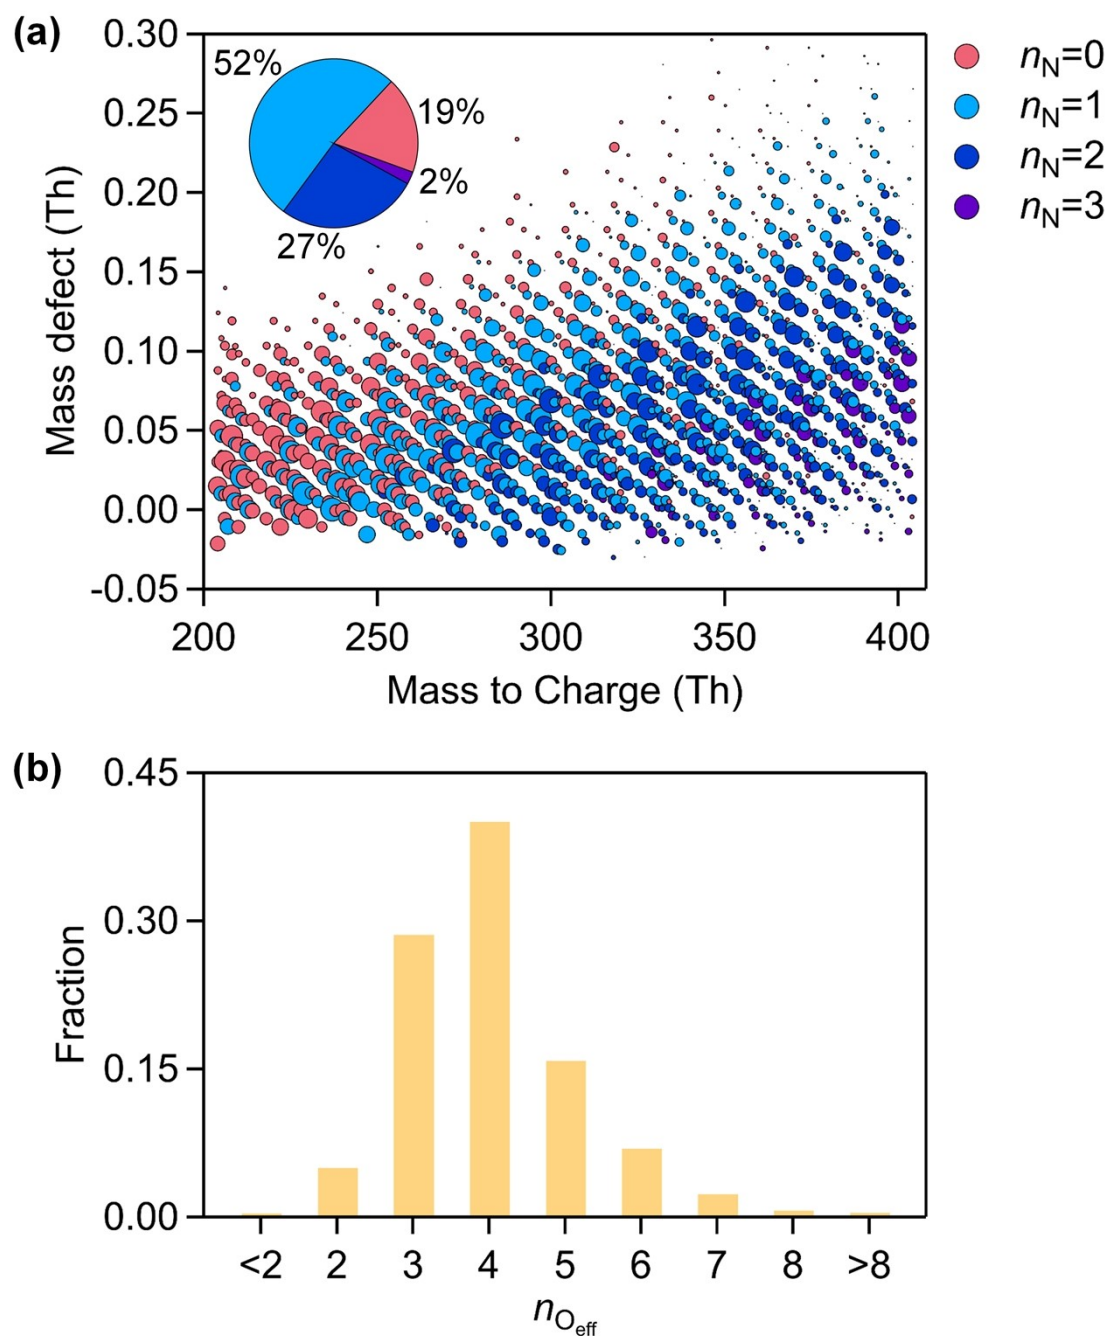

328

329 Fig. S18 The molecular information of the high-quality OOMs dataset. (a) Mass defect  
 330 plot of the OOMs dataset. The x axis shows the exact mass of the OOMs and y axis  
 331 shows their mass defect (exact mass subtracted by its unit mass). The color of the  
 332 marker point represents  $n_N$  and the size of the marker point corresponds to the  
 333 concentration of OOMs, (b) the distribution of OOMs dataset grouped by  $n_{O_{eff}}$ .

334

335 S11 Relationship of OOMs with O<sub>3</sub>, PM<sub>2.5</sub>

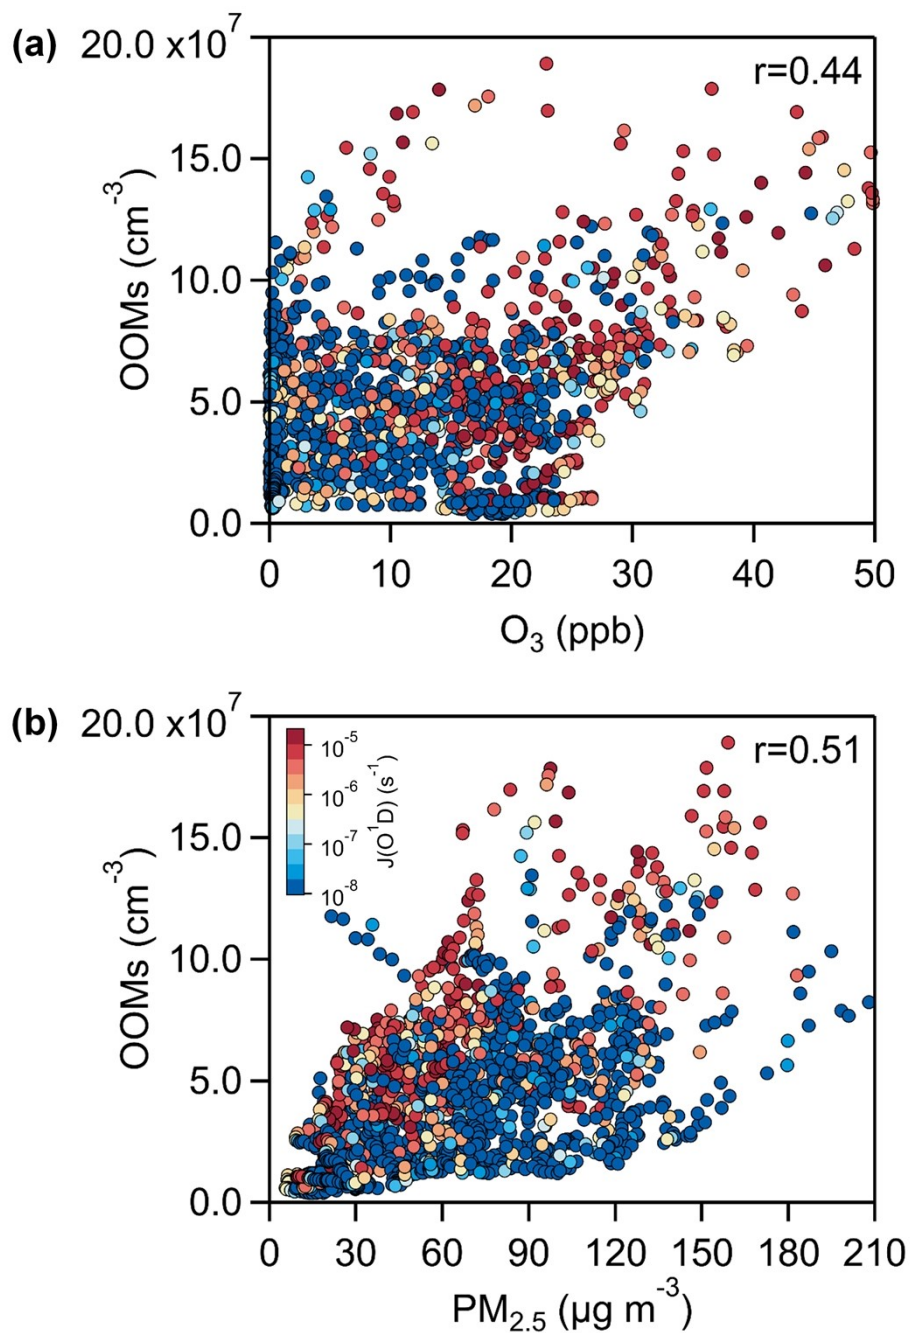

336  
337 Fig. S19 The scatter plot of OOMs with (a) O<sub>3</sub>, (b) PM<sub>2.5</sub> in all time, each dot is colored  
338 by J(O<sup>1</sup>D).

339

340 S12 Relationship of PM<sub>2.5</sub> with O<sub>x</sub> and PAN

341

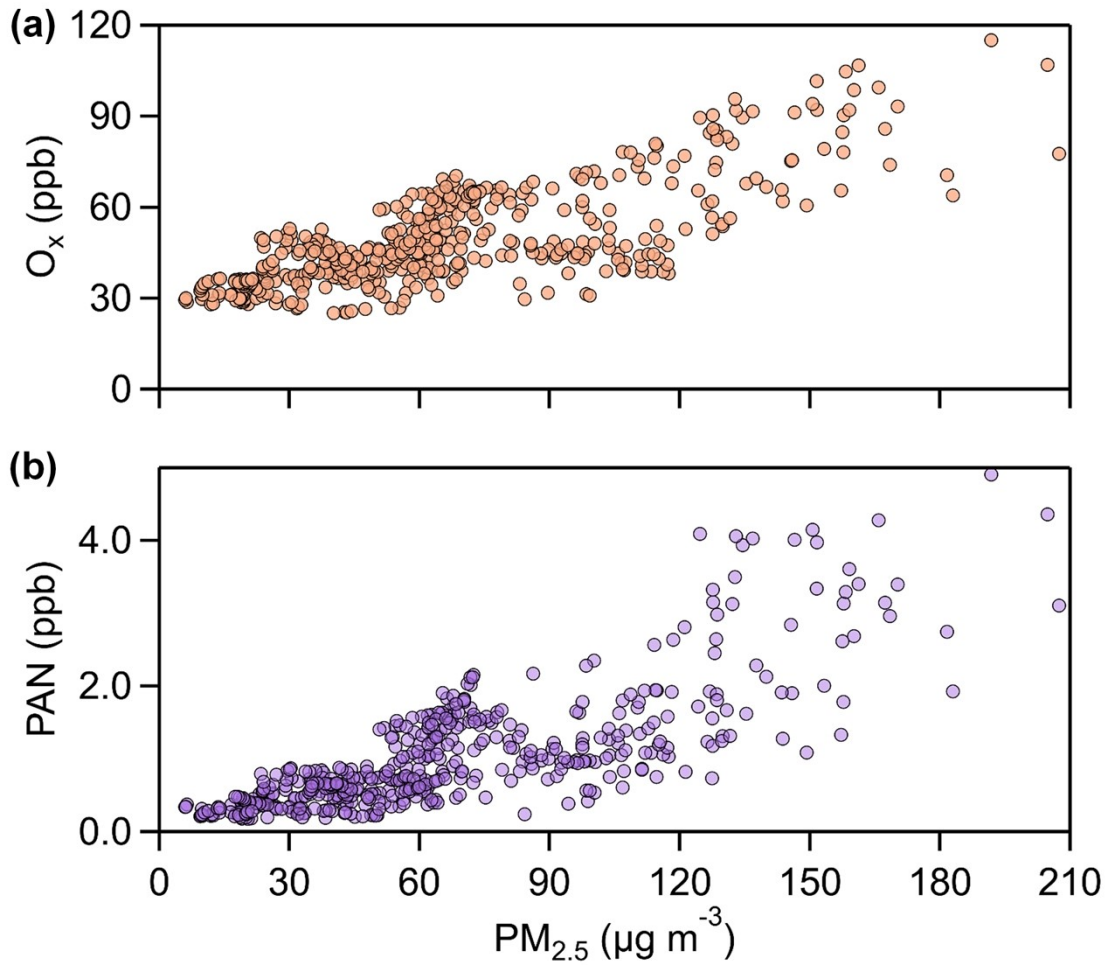

342  
 343 Fig. S20 The scatter plot of PM<sub>2.5</sub> with (a) O<sub>x</sub> (O<sub>x</sub> = O<sub>3</sub> + NO<sub>2</sub> + NO<sub>z</sub>, NO<sub>z</sub> = NO<sub>y</sub> –  
 344 NO<sub>x</sub>), (b) PAN in the daytime.  
 345

346 **S13 The calculation of OH proxy**

347 The OH proxy is calculated by applying the Eq. (11):

348

$$OH\ proxy = \frac{[H_2SO_4] \times CS}{[SO_2]} \quad (11)$$

349

350 Where the value of CS was calculated following Eq. (14)<sup>11</sup>:

351

$$CS = 2\pi D \sum_i \beta_{m_i} d_{p_i} N_i \quad (12)$$

352

353

354 Where D is the diffusion coefficient of gaseous sulfuric acid, β<sub>m</sub> is a transition-regime  
 355 correction factor dependent on the Knudsen number<sup>12</sup>, and  $d_{p_i}$  and N<sub>i</sub> are the diameter  
 356 and number concentration of particles in size bin i.

357

358

359

360

361

362

363 **Reference**

364

365 1. Y. J. Zhang, O. Perakyla, C. Yan, L. Heikkinen, M. Aijala, K. R. Daellenbach, Q. Z. Zha, M.  
366 Riva, O. Garmash, H. Junninen, P. Paatero, D. Worsnop and M. Ehn, A novel approach for  
367 simple statistical analysis of high-resolution mass spectra, *Atmospheric Measurement*  
368 *Techniques*, 2019, **12**, 3761-3776.

369 2. A. V. Polissar, P. K. Hopke, P. Paatero, W. C. Malm and J. F. Sisler, Atmospheric aerosol over  
370 Alaska: 2. Elemental composition and sources, *Journal of Geophysical Research: Atmospheres*,  
371 1998, **103**, 19045-19057.

372 3. J. D. Allan, J. L. Jimenez, P. I. Williams, M. R. Alfarra, K. N. Bower, J. T. Jayne, H. Coe and D.  
373 R. Worsnop, Quantitative sampling using an Aerodyne aerosol mass spectrometer 1.  
374 Techniques of data interpretation and error analysis, *Journal of Geophysical Research:*  
375 *Atmospheres*, 2003, **108**, 4283.

376 4. C. Yan, W. Nie, M. Äijälä, M. P. Rissanen, M. R. Canagaratna, P. Massoli, H. Junninen, T.  
377 Jokinen, N. Sarnela, S. A. K. Häme, S. Schobesberger, F. Canonaco, L. Yao, A. S. H. Prévôt,  
378 T. Petäjä, M. Kulmala, M. Sipilä, D. R. Worsnop and M. Ehn, Source characterization of highly  
379 oxidized multifunctional compounds in a boreal forest environment using positive matrix  
380 factorization, *Atmospheric Chemistry and Physics*, 2016, **16**, 12715-12731.

381 5. Q. Zhang, J. L. Jimenez, M. R. Canagaratna, I. M. Ulbrich, N. L. Ng, D. R. Worsnop and Y. Sun,  
382 Understanding atmospheric organic aerosols via factor analysis of aerosol mass spectrometry:  
383 a review, *Anal Bioanal Chem*, 2011, **401**, 3045-3067.

384 6. Y. Liu, W. Nie, Y. Li, D. Ge, C. Liu, Z. Xu, L. Chen, T. Wang, L. Wang, P. Sun, X. Qi, J. Wang,  
385 Z. Xu, J. Yuan, C. Yan, Y. Zhang, D. Huang, Z. Wang, N. M. Donahue, D. Worsnop, X. Chi,  
386 M. Ehn and A. Ding, Formation of condensable organic vapors from anthropogenic and  
387 biogenic volatile organic compounds (VOCs) is strongly perturbed by NO<sub>x</sub> in eastern China,  
388 *ATMOSPHERIC CHEMISTRY AND PHYSICS*, 2021, **21**, 14789-14814.

389 7. J. H. Kroll, N. M. Donahue, J. L. Jimenez, S. H. Kessler, M. R. Canagaratna, K. R. Wilson, K. E.  
390 Altieri, L. R. Mazzoleni, A. S. Wozniak, H. Bluhm, E. R. Mysak, J. D. Smith, C. E. Kolb and  
391 D. R. Worsnop, Carbon oxidation state as a metric for describing the chemistry of atmospheric  
392 organic aerosol, *Nature Chemistry*, 2011, **3**, 133-139.

393 8. N. M. Donahue, S. A. Epstein, S. N. Pandis and A. L. Robinson, A two-dimensional volatility  
394 basis set: 1. organic-aerosol mixing thermodynamics, *Atmospheric Chemistry and Physics*,  
395 2011, **11**, 3303-3318.

396 9. D. Stolzenburg, L. Fischer, A. L. Vogel, M. Heinritzi, M. Schervish, M. Simon, A. C. Wagner,  
397 L. Dada, L. R. Ahonen, A. Amorim, A. Baccharini, P. S. Bauer, B. Baumgartner, A. Bergen, F.  
398 Bianchi, M. Breitenlechner, S. Brilke, S. B. Mazon, D. Chen, A. Dias, D. C. Draper, J. Duplissy,  
399 I. El Haddad, H. Finkenzeller, C. Frege, C. Fuchs, O. Garmash, H. Gordon, X. He, J. Helm, V.  
400 Hofbauer, C. R. Hoyle, C. Kim, J. Kirkby, J. Kontkanen, A. Kuerten, J. Lampilahti, M. Lawler,  
401 K. Lehtipalo, M. Leiminger, H. Mai, S. Mathot, B. Mentler, U. Molteni, W. Nie, T. Nieminen,  
402 J. B. Nowak, A. Ojdanic, A. Onnela, M. Passananti, T. Petaja, L. L. J. Quelever, M. P. Rissanen,  
403 N. Sarnela, S. Schallhart, C. Tauber, A. Tome, R. Wagner, M. Wang, L. Weitz, D. Wimmer, M.  
404 Xiao, C. Yan, P. Ye, Q. Zha, U. Baltensperger, J. Curtius, J. Dommen, R. C. Flagan, M.



- 405 Kulmala, J. N. Smith, D. R. Worsnop, A. Hansel, N. M. Donahue and P. M. Winkler, Rapid  
406 growth of organic aerosol nanoparticles over a wide tropospheric temperature range, *Proc. Natl.*  
407 *Acad. Sci. U. S. A.*, 2018, **115**, 9122-9127.
- 408 10. S. A. Epstein, I. Riipinen and N. M. Donahue, A Semiempirical Correlation between Enthalpy  
409 of Vaporization and Saturation Concentration for Organic Aerosol, *Environmental Science &*  
410 *Technology*, 2010, **44**, 743-748.
- 411 11. M. Kulmala, T. Petaja, T. Nieminen, M. Sipila, H. E. Manninen, K. Lehtipalo, M. Dal Maso, P.  
412 P. Aalto, H. Junninen, P. Paasonen, I. Riipinen, K. E. Lehtinen, A. Laaksonen and V. M.  
413 Kerminen, Measurement of the nucleation of atmospheric aerosol particles, *Nat Protoc*, 2012,  
414 **7**, 1651-1667.
- 415 12. N. A. Fuchs and A. G. Sutugin, in *Topics in Current Aerosol Research*, eds. G. M. Hidy and J. R.  
416 Brock, Pergamon, 1971, p. 1.
- 417
